# Supplementary material for: Antibacterial and Mode of Action of Extracts from Endophytic Fungi Derived from Terminalia mantaly, Terminalia catappa, and Cananga odorata
Source: Hindawi journal article supplement (doi:10.1155/2021/6697973), 2021-01-01
Supplement: f1 [file 6697973.f1.pdf]

1 **Antibacterial and mode of action of extracts from endophytic fungi derived**  
2 **from *Terminalia mantaly*, *Terminalia catappa* and *Cananga odorata***

3 Michele Ines Kanko Mbekou<sup>1</sup>, Darline Dize<sup>1</sup>, Victorine Lorette Yimgang<sup>1</sup>, Fred Djague<sup>1</sup>, Rufin  
4 Marie Kouipou Toghueo<sup>1</sup>, Norbert Sewald<sup>2</sup>, Bruno Njakou Lenta<sup>3</sup>, Fabrice Fekam Boyom<sup>1\*</sup>

5 <sup>1</sup>Department of Biochemistry, Faculty of Science, University of Yaoundé I, P.O. Box 812,  
6 Messa-Yaoundé, Cameroon

7 <sup>2</sup>Department of Chemistry, Organic and Bioorganic Chemistry, Bielefeld University, P.O. Box  
8 100131, D-33501 Bielefeld, Germany

9 <sup>3</sup>Department of Chemistry, Higher Teacher Training College, University of Yaoundé 1, P.O.  
10 Box 47, 237 Yaoundé, Cameroon

11 \*Correspondence: [fabrice.boyom@fulbrightmail.org](mailto:fabrice.boyom@fulbrightmail.org)

12

13 **Supplementary material 1: Endophytic fungi: their host plant, isolation site and names**

| Plant name             | Site of isolation | Fungi isolate | Fungal name                  |
|------------------------|-------------------|---------------|------------------------------|
| <i>Cananga odorata</i> | Petals            | N431          | <i>Unidentified fungal</i>   |
|                        |                   | N422          | <i>Unidentified fungal</i>   |
|                        |                   | N399          | <i>Unidentified fungal</i>   |
|                        |                   | N419          | <i>Unidentified fungal</i>   |
|                        |                   | N401          | <i>Unidentified fungal</i>   |
|                        | Flowers           | N478          | <i>Unidentified fungal</i>   |
|                        | Ribs              | N454          | <i>Aspergillus</i> sp        |
|                        | Leaves            | N330          | <i>Diaporthe phaseolorum</i> |

|  |           |       |                            |
|--|-----------|-------|----------------------------|
|  | Stem      | N284  | <i>Unidentified fungal</i> |
|  |           | N283  | <i>Unidentified fungal</i> |
|  |           | N298  | <i>Diaporthaceae sp</i>    |
|  |           | N289  | <i>Unidentified fungal</i> |
|  | Bark      | N241  | <i>Fungal sp.</i>          |
|  |           | N262  | <i>Unidentified fungal</i> |
|  |           | N263  | <i>Unidentified fungal</i> |
|  |           | N266  | <i>Unidentified fungal</i> |
|  |           | N251  | <i>Unidentified fungal</i> |
|  |           | N276  | <i>Unidentified fungal</i> |
|  |           | N256  | <i>Unidentified fungal</i> |
|  |           | N2541 | <i>Unidentified fungal</i> |
|  |           | N240  | <i>Fusarium sp</i>         |
|  |           | N268  | <i>Fungal sp</i>           |
|  | Root      | N441  | <i>Unidentified fungal</i> |
|  |           | N448  | <i>Unidentified fungal</i> |
|  |           | N445  | <i>Unidentified fungal</i> |
|  | Root bark | N368  | <i>Unidentified fungal</i> |
|  | Ribs      | N32   | <i>Corynespora sp</i>      |

|                           |           |      |                                       |
|---------------------------|-----------|------|---------------------------------------|
| <i>Terminalia catappa</i> | Leaves    | N89  | <i>Fungal endophyte sp</i>            |
|                           |           | N114 | <i>Phomopsis sp</i>                   |
|                           |           | N108 | <i>Guignardia sp</i>                  |
|                           | Stem      | N75  | <i>Pestalotiopsis sp</i>              |
|                           |           | N74  | <i>Xylaria sp</i>                     |
|                           |           | N44  | <i>Unidentified fungal</i>            |
|                           |           | N781 | <i>Paraconiothyrium<br/>variabile</i> |
|                           |           | N51  | <i>Pestalotiopsis sp</i>              |
|                           |           | N58  | <i>Unidentified fungal</i>            |
|                           | Bark      | N44  | <i>Unidentified fungal</i>            |
|                           |           | N101 | <i>Curvularia sp</i>                  |
|                           |           | N97  | <i>Trichoderma sp</i>                 |
|                           | Root bark | N81  | <i>Phomopsis sp</i>                   |
|                           |           | N18  | <i>Aspergillus sp</i>                 |
|                           |           | N13  | <i>Aspergillus sp</i>                 |
|                           |           | N23  | <i>Unidentified fungal</i>            |
|                           |           |      | N15                                   |
|                           |           | N201 | <i>Colletotrichum sp</i>              |

|                           |        |                            |                            |
|---------------------------|--------|----------------------------|----------------------------|
| <i>Terminalia mantaly</i> | Ribs   | N200                       | <i>Fungal sp</i>           |
|                           |        | N191                       | <i>Unidentified fungal</i> |
|                           |        | N196                       | <i>Unidentified fungal</i> |
|                           |        | N221                       | <i>Unidentified fungal</i> |
|                           |        | N230 <sub>2</sub>          | <i>Unidentified fungal</i> |
|                           |        | N229 <sub>1</sub>          | <i>Diaporthales sp</i>     |
|                           | Leaves | N127                       | <i>Diaporthales sp</i>     |
|                           |        | N116                       | <i>Phoma sp</i>            |
|                           |        | N120                       | <i>Xylaria laevis</i>      |
|                           | Stem   | N162                       | <i>Diaporthe sp</i>        |
|                           | Bark   | N190 <sub>1</sub>          | <i>Unidentified fungal</i> |
| N178                      |        | <i>Unidentified fungal</i> |                            |

**Supplementary material 2:** Extraction yield (mg/200mL), and MIC ( $\mu\text{g/mL}$ ) of ethyl acetate extracts from endophytic fungi (Mean  $\pm$ SD)

| Plant name                   | Fungal name                       | Yield           | EC ATCC<br>25922 | SA ATCC<br>43300 | SA BAA-<br>977   | SP ATCC<br>49619 | HI ATCC<br>49247 | PA HM 601        | KP ATCC<br>13883 |
|------------------------------|-----------------------------------|-----------------|------------------|------------------|------------------|------------------|------------------|------------------|------------------|
| <i>Cananga odorata</i>       | <i>Unidentified fungal</i> N431   | 104             | 3.125 $\pm$ 0.00 | 12.5 $\pm$ 0.00  | 3.125 $\pm$ 0.00 | 6.25 $\pm$ 0.00  | 0.78 $\pm$ 0.00  | 3.125 $\pm$ 0.00 | 3.125 $\pm$ 0.00 |
|                              | <i>Unidentified fungal</i> N422   | 100             | 2.343 $\pm$ 1.11 | 23.14 $\pm$ 0.00 | 5.787 $\pm$ 0.00 | 3.125 $\pm$ 0.00 | 25 $\pm$ 0.00    | 3.125 $\pm$ 0.00 | 25 $\pm$ 0.00    |
|                              | <i>Unidentified fungal</i> N399   | 128             | 0.39 $\pm$ 0.00  | 12.5 $\pm$ 0.00  | 3.125 $\pm$ 0.00 | 3.125 $\pm$ 0.00 | 2.343 $\pm$ 1.11 | 12.5 $\pm$ 0.00  | 12.5 $\pm$ 0.00  |
|                              | <i>Unidentified fungal</i> N419   | 132             | 0.78 $\pm$ 0.00  | 5.787 $\pm$ 0.00 | 5.787 $\pm$ 0.00 | 3.125 $\pm$ 0.00 | >25              | 1.56 $\pm$ 0.00  | 25 $\pm$ 0.00    |
|                              | <i>Unidentified fungal</i> N401   | 100             | 1.17 $\pm$ 0.55  | 6.25 $\pm$ 0.00  | 6.25 $\pm$ 0.00  | 3.125 $\pm$ 0.00 | 1.56 $\pm$ 0.00  | 25 $\pm$ 0.00    | 25 $\pm$ 0.00    |
|                              | <i>Unidentified fungal</i> N478   | 120             | 12.5 $\pm$ 0.00  | 25 $\pm$ 0.00    | 25 $\pm$ 0.00    | 3.125 $\pm$ 0.00 | 25 $\pm$ 0.00    | 12.5 $\pm$ 0.00  | 25 $\pm$ 0.00    |
|                              | <i>Aspergillus</i> sp N454        | 100             | 1.56 $\pm$ 0.00  | 1.56 $\pm$ 0.90  | 3.125 $\pm$ 0.00 | 3.125 $\pm$ 0.00 | 0.78 $\pm$ 0.00  | 3.125 $\pm$ 0.00 | 6.25 $\pm$ 0.00  |
|                              | <i>Diaporthe phaseolorum</i> N330 | 80              | 1.56 $\pm$ 0.00  | 5.787 $\pm$ 0.00 | 5.787 $\pm$ 0.00 | 3.125 $\pm$ 0.00 | 25 $\pm$ 0.00    | 1.56 $\pm$ 0.00  | 12.5 $\pm$ 0.00  |
|                              | <i>Unidentified fungal</i> N284   | 106             | 3.125 $\pm$ 0.00 | 6.25 $\pm$ 0.00  | 6.25 $\pm$ 0.00  | 3.125 $\pm$ 0.00 | 3.125 $\pm$ 0.00 | 6.25 $\pm$ 0.00  | 6.25 $\pm$ 0.00  |
|                              | <i>Unidentified fungal</i> N283   | 69              | 0.78 $\pm$ 0.00  | 2.343 $\pm$ 1.11 | 3.125 $\pm$ 0.00 | 3.125 $\pm$ 0.00 | 1.56 $\pm$ 0.00  | 12.5 $\pm$ 0.00  | 12.5 $\pm$ 0.00  |
| <i>Diaporthaceae</i> sp N298 | 130                               | 1.56 $\pm$ 0.00 | 5.787 $\pm$ 0.00 | 5.787 $\pm$ 0.00 | 3.125 $\pm$ 0.00 | 12.5 $\pm$ 0.00  | 1.56 $\pm$ 0.00  | 12.5 $\pm$ 0.00  |                  |

|                                              |     |              |              |              |               |              |             |             |
|----------------------------------------------|-----|--------------|--------------|--------------|---------------|--------------|-------------|-------------|
| <i>Unidentified fungal</i> N289              | 111 | 0.78 ± 0.00  | 12.5 ± 0.00  | 3.125 ± 0.00 | 3.125 ± 0.00  | 2.343 ± 1.11 | 12.5 ± 0.00 | 12.5 ± 0.00 |
| <i>Fungal sp</i> N241                        | 110 | 1.56 ± 0.00  | 23.14 ± 0.00 | 23.14 ± 0.00 | 25 ± 0.00     | 12.5 ± 0.00  | 1.56 ± 0.00 | 12.5 ± 0.00 |
| <i>Unidentified fungal</i> N262              | 165 | >25          | >25          | >25          | >25           | >25          | >25         | >25         |
| <i>Unidentified fungal</i> N263              | 94  | 3.125 ± 0.00 | 6.25 ± 0.00  | 3.125 ± 0.00 | 3.125 ± 0.00  | 0.78 ± 0.00  | 6.25 ± 0.00 | 12.5 ± 0.00 |
| <i>Unidentified fungal</i> N266              | 70  | 3.125 ± 0.00 | 6.25 ± 0.00  | 6.25 ± 0.00  | 6.25 ± 0.00   | 3.125 ± 0.00 | 6.25 ± 0.00 | 6.25 ± 0.00 |
| <i>Unidentified fungal</i> N251              | 110 | 12.5 ± 0.00  | 12.5 ± 0.00  | 25 ± 0.00    | 6.25 ± 0.00   | 25 ± 0.00    | 12.5 ± 0.00 | 12.5 ± 0.00 |
| <i>Fungal sp</i> N268                        | 70  | ND           | 23.14 ± 0.00 | 11.57 ± 0.00 | 6.25 ± 0.00   | 25 ± 0.00    | 1.56 ± 0.00 | 25 ± 0.00   |
| <i>Unidentified fungal</i> N276              | 60  | 0.78 ± 0.00  | 3.125 ± 0.00 | 25 ± 0.00    | 3.125 ± 0.00  | 25 ± 0.00    | 25 ± 0.00   | 25 ± 0.00   |
| <i>Unidentified fungal</i> N256              | 152 | 6.25 ± 0.00  | 6.25 ± 0.00  | 6.25 ± 0.00  | 3.125 ± 0.00  | 3.125 ± 0.00 | 6.25 ± 0.00 | 12.5 ± 0.00 |
| <i>Unidentified fungal</i> N254 <sub>1</sub> | 52  | 4.688 ± 0.00 | 12.5 ± 0.00  | 12.5 ± 0.00  | 6.25 ± 0.00   | 3.125 ± 0.00 | 6.25 ± 0.00 | 25 ± 0.00   |
| <i>Fusarium sp</i> N240                      | 160 | 1.56 ± 0.00  | 23.14 ± 0.00 | 11.57 ± 0.00 | 6.25 ± 0.00   | 6.25 ± 0.00  | 1.56 ± 0.00 | 12.5 ± 0.00 |
| <i>Unidentified fungal</i> N441              | 109 | 6.25 ± 0.00  | 6.25 ± 0.00  | 6.25 ± 0.00  | 3.125 ± 0.00  | 3.125 ± 0.00 | 12.5 ± 0.00 | 12.5 ± 0.00 |
| <i>Unidentified fungal</i> N448              | 70  | 0.78 ± 0.00  | 23.14 ± 0.00 | 5.787 ± 0.00 | 3.6875 ± 0.00 | 25 ± 0.00    | 0.78 ± 0.00 | 12.5 ± 0.00 |
| <i>Unidentified fungal</i> N445              | 200 | 3.125 ± 0.00 | 23.14 ± 0.00 | 11.57 ± 0.00 | 6.25 ± 0.00   | 25 ± 0.00    | 6.25 ± 0.00 | 25 ± 0.00   |

|                               |                                                    |     |              |              |              |              |             |             |             |
|-------------------------------|----------------------------------------------------|-----|--------------|--------------|--------------|--------------|-------------|-------------|-------------|
|                               | <i>Unidentified fungal</i> N368                    | 123 | 12.5 ± 0.00  | 25 ± 0.00    | 25 ± 0.00    | 6.25 ± 0.00  | 25 ± 0.00   | 12.5 ± 0.00 | 12.5 ± 0.00 |
| <i>Terminalia<br/>catappa</i> | <i>Corynespora</i> sp N32                          | 70  | 1.56 ± 0.00  | 23.14 ± 0.00 | 11.57 ± 0.00 | 6.25 ± 0.00  | 12.5 ± 0.00 | 1.56 ± 0.00 | 12.5 ± 0.00 |
|                               | <i>Fungal endophyte</i> sp N89                     | 80  | 1.56 ± 0.00  | 23.14 ± 0.00 | 11.57 ± 0.00 | 6.25 ± 0.00  | 12.5 ± 0.00 | 1.56 ± 0.00 | 12.5 ± 0.00 |
|                               | <i>Phomopsis</i> sp N114                           | 140 | 3.125 ± 0.00 | 23.14 ± 0.00 | 11.57 ± 00   | 6.25 ± 0.00  | 12.5 ± 0.00 | 1.56 ± 0.00 | 12.5 ± 0.00 |
|                               | <i>Guignardia</i> sp N108                          | 110 | 2.343 ± 1.11 | 11.57 ± 0.00 | 5.787 ± 0.00 | 3.125 ± 0.00 | 12.5 ± 0.00 | 1.56 ± 0.00 | 12.5 ± 0.00 |
|                               | <i>Pestalotiopsis</i> sp N75                       | 100 | 3.125 ± 0.00 | 5.787 ± 0.00 | 5.787 ± 0.00 | 3.125 ± 0.00 | 25 ± 0.00   | 1.56 ± 0.00 | 25 ± 0.00   |
|                               | <i>Xylaria</i> sp N74                              | 80  | 4.688 ± 0.00 | 23.14 ± 0.00 | 5.787 ± 0.00 | 6.25 ± 0.00  | 12.5 ± 0.00 | 6.25 ± 0.00 | 6.25 ± 0.00 |
|                               | <i>Paraconiothyrium variabile</i> N78 <sub>1</sub> | 170 | 1.56 ± 0.00  | 23.14 ± 0.00 | 11.57 ± 0.00 | 6.25 ± 0.00  | 12.5 ± 0.00 | 1.56 ± 0.00 | 25 ± 0.00   |
|                               | <i>Pestalotiopsis</i> sp N51                       | 70  | 1.56 ± 0.00  | 11.57 ± 0.00 | 5.787 ± 0.00 | 3.125 ± 0.00 | 12.5 ± 0.00 | 1.56 ± 0.00 | 6.25 ± 0.00 |
|                               | <i>Unidentified fungal</i> N58                     | 60  | 3.125 ± 0.00 | 23.14 ± 0.00 | 5.787 ± 0.00 | 6.25 ± 0.00  | 25 ± 0.00   | 1.56 ± 0.00 | 12.5 ± 0.00 |
|                               | <i>Unidentified fungal</i> N44                     | 70  | 1.17 ± 0.00  | 23.14 ± 0.00 | 11.57 ± 0.00 | 6.25 ± 0.00  | 25 ± 0.00   | 1.56 ± 0.00 | 25 ± 0.00   |
|                               | <i>Curvularia</i> sp N101                          | 102 | 1.56 ± 0.00  | 4.69 ± 1.80  | 3.125 ± 0.00 | 3.125 ± 0.90 | 1.56 ± 0.90 | 6.25 ± 0.00 | 6.25 ± 0.00 |
|                               | <i>Trichoderma</i> sp N97                          | 60  | 0.78 ± 0.00  | 23.14 ± 0.00 | 11.57 ± 0.00 | 6.25 ± 0.00  | 25 ± 0.00   | 1.56 ± 0.00 | 25 ± 0.00   |
|                               | <i>Phomopsis</i> sp N81                            | 40  | 1.56 ± 0.00  | 11.57 ± 0.00 | 5.787 ± 0.00 | 3.125 ± 0.00 | 25 ± 0.00   | 25 ± 0.00   | 25 ± 0.00   |





|                 |                                              |     |             |              |              |              |             |              |             |
|-----------------|----------------------------------------------|-----|-------------|--------------|--------------|--------------|-------------|--------------|-------------|
|                 | <i>Diaporthe</i> sp N162                     | 159 | >25         | >25          | >25          | 12.5 ± 0.00  | >25         | >25          | >25         |
|                 | <i>Unidentified fungal</i> N190 <sub>1</sub> | 120 | 0.78 ± 0.00 | 23.14 ± 0.00 | 5.787 ± 0.00 | 3.125 ± 0.00 | 6.25 ± 0.00 | 1.56 ± 0.00  | 6.25 ± 0.00 |
|                 | <i>Unidentified fungal</i> N178              | 134 | >25         | >25          | >25          | >25          | >25         | >25          | >25         |
| Reference drugs | Amoxicillin                                  | /   | 4 ± 00      | 16 ± 0.00    | 64 ± 0.00    | 16 ± 0.00    | 4 ± 0.00    | 32 ± 0.15600 | 32 ± 0.00   |
|                 | Ciprofloxacin                                | /   | 2 ± 0.00    | 4 ± 0.00     | 1 ± 0.00     | 32 ± 0.00    | 1 ± 0.00    | 1 ± 0.00     | 8 ± 0.00    |

SA: *Staphylococcus aureus*; EC: *Escherichia coli*; SP: *Streptococcus pneumoniae*; HI: *Haemophilus influenzae*; PA: *Pseudomonas aeruginosa*; KP: *Klebsiella pneumoniae*
